1 **Job insecurity, financial threat and mental health in the COVID-19 context: The buffer role**  
2 **of perceived social support**

3  
4 Carlos-María Alcover<sup>1¶</sup>, Sergio Salgado<sup>2\*¶</sup>, Gabriela Nazar<sup>3¶</sup>, Raúl Ramírez-Vielma<sup>3¶</sup>, Carolina  
5 González-Suhr<sup>2¶</sup>.

6  
7 <sup>1</sup> Departamento de Psicología, Universidad Rey Juan Carlos, Madrid, Comunidad de Madrid,  
8 España.

9 <sup>2</sup> Departamento de Administración y Economía, Universidad de La Frontera, Temuco, Región de la  
10 Araucanía, Chile.

11 <sup>3</sup> Departamento de Psicología, Universidad de Concepción, Concepción, Región del Biobío, Chile.

12  
13 \* Corresponding author:

14 E-mail: [sergio.salgado@ufrontera.cl](mailto:sergio.salgado@ufrontera.cl) (SS)

15  
16 ¶ These authors contributed equally to this work.

17  
18 **Abstract**

19 The social distancing, confinement and quarantine adopted since March 2020 to confront the  
20 COVID-19 pandemic have affected multiple vital areas, and specially work, business and productive  
21 activities. Prior research has highlighted the relation between perceptions of risk in employment and  
22 its concomitant financial risk with a myriad of consequences for people's well-being and health. In  
23 order to analyze the potential negative consequences of temporary layoffs, downsizing or closure of  
24 companies and businesses, and the consequent insecurity about the continuity of employment, the  
25 aim of this study is twofold. Firstly, to analyze the relations between the perceptions of job insecurity  
26 and financial threat and overall mental health during the first month of the COVID-19 pandemic in  
27 a sample of the Chilean adult population. And secondly, to identify the potential buffer effect of  
28 perceived social support on this relation. To analyze this, we carried out a cross-sectional study on  
29 a non-probabilistic sample aimed at a general Chilean adult population. The results show that both  
30 perceptions of job insecurity and financial threat are associated with a decline in perceived mental  
31 health. Additionally, results indicate a moderate buffer effect of perceived social support relative to  
32 the size of the social network. Thus, in relation to job insecurity and financial threat, the network  
33 size mitigates the association of both with the decline in perceived mental health. The theoretical

34 **NOTE: This preprint reports new research that has not been certified by peer review and should not be used to guide clinical practice.**  
and applied scope of these findings are analyzed, and their challenges and limitations are discussed.

35

## Introduction

36           The disruptive effects of social distancing, confinement and quarantine adopted to confront  
37 the Covid-19 pandemic have affected multiple vital areas. Since March 2020, with its rapid  
38 expansion in Europe and later in America, work activities have suffered drastic changes. On the one  
39 hand, governments and businesses imposed or recommended working from home or remotely,  
40 which affected all types of activities, except for the essential sectors and services where being  
41 present was unavoidable (hospitals, basic product sourcing, pharmacies, food sales, etc.). On the  
42 other hand, a good number of productive sectors suddenly suspended their activities, affecting the  
43 majority of commerce, small services and hospitality businesses as well as industry in other  
44 activities considered non-essential, which resulted in the loss or temporary layoffs for a high number  
45 of workers. The economic implications of the global pandemic, called ‘Corononomics’ [1], are still  
46 difficult to estimate in all their macro and micro magnitude on a global scale and per country [2];  
47 however, the effects on people and their families who lost their job, suffered a temporary layoff or  
48 have kept it but perceive its possible loss or a deterioration in their working conditions, are already  
49 evident and can be identified.

50           Research conducted in the two last decades, and particularly since the beginning of the Great  
51 Recession of 2008, has uncovered the relation between perceptions of risk in employment and its  
52 concomitant financial risk with a myriad of consequences for people’s well-being and health. Thus,  
53 job insecurity (e.g. [3-5]) and financial insecurity (e.g. [6-8]) have negative effects on many aspects  
54 of people’s physical, mental and psychosocial health, including even direct effects on mortality  
55 when health is fragile [9] or it leads to suicidal behaviors [10], as well as affects family [11] and  
56 partner relationships.

57           On the other hand, previous research has shown the buffer effect of social support on the  
58 negative effects of job insecurity [12, 13]. Thus, the support received at work mitigates the negative  
59 effect of job insecurity on certain work-related outcomes, such as job dissatisfaction and  
60 noncompliant job behaviors, whereas the support received outside of work does so in relation to life

61 dissatisfaction [14]. There is also empirical evidence of the buffer role of tangible social support in  
62 the relation between financial stress and psychological well-being and psychosomatic disorders  
63 [15], an effect that has been verified for both instrumental and emotional support [16].

64 In Chile, where this study was conducted, social distancing and confinement were adopted  
65 in mid-March 2020, which meant shutting down and closing multiple productive activities with the  
66 resulting temporary layoff or suspension of the work contract for a high number of workers, as well  
67 as the increase in uncertainty about future job continuity for many employees in vulnerable work  
68 situations. In order to analyze the potential negative consequences of these experiences, the aim of  
69 this study is twofold. Firstly, to analyze the relations between the perceptions of job insecurity and  
70 financial threat and overall mental health during the first month of the pandemic in a sample of the  
71 Chilean adult population. And secondly, to identify the potential buffer effect of perceived social  
72 support on this relation. Thus, our goal is carrying out an initial analysis of how work and economic  
73 factors can affect people's mental health in a context of a prolonged health emergency and the  
74 concomitant economic crisis.

## 75 **Theoretical Background and Hypothesis**

### 76 **Consequences of Job Insecurity on Mental Health and Health Correlates**

77 Job insecurity refers to "the perceived threat of job loss and the worries related to that threat"  
78 [17, p. 1]. Basically, it is a subjective anticipatory perception, the core of which is concern and fear  
79 regarding the future continuity of one's current job in the short or medium term, i.e., of involuntarily  
80 losing one's job with all the related negative consequences for well-being and mental health, job  
81 attitudes and behaviors, and quality of life [18-20]. Job insecurity can be experienced in two ways,  
82 both in the sense of full job loss or quantitative insecurity [18, 21], and by changes in what, how,  
83 where and when work is done, or job status insecurity, "relating to anxiety about changes to valued  
84 features of the job" [22, p. 36], also called qualitative insecurity [21].

85 In short, the characteristics of job insecurity are [23]: subjective experience, future-focused  
86 phenomenon, perception, and response to anticipated visualization of (job or job valued features)  
87 loss. Further, experiences of job insecurity depend on three threat features: perceived situational  
88 control, threat duration and volition. Consequently [23], lower control, longer duration and lower  
89 volition will cause increased distress in workers, with detrimental effects on personal physical and  
90 psychological health and work-related well-being [5, 23-24]. Finally, other authors [26] have  
91 proposed differentiating the cognitive components of job insecurity related to the perception of loss  
92 or negative job change, from the affective components related to the emotional reactions to job loss  
93 or potential job change. The meta-analytic results [26] show that affective job insecurity is more  
94 significantly related to most of the correlates and outcomes than cognitive job insecurity. However,  
95 most research has used a global perspective (i.e., one-dimensional) of quantitative job insecurity  
96 (e.g. [18, 20, 27]), and this is the approach and measure adopted in this study.

97 Extensive prior research has identified the most relevant effects of job insecurity. First, the  
98 meta-analytic results had shown an overall negative effect on general mental health [19, 28], as well  
99 as for specific disorders such as anxiety, depression, decrease on psychological well-being,  
100 emotional exhaustion or life dissatisfaction [29]. Job insecurity is also associated with increased  
101 anxiety and irrational thoughts as well as psychological distancing at work, similar to what is  
102 experienced when face death or dismemberment [30]. Furthermore, negative effects of job  
103 insecurity have also been found on physical health, including headaches or eyestrain and skin  
104 problems [31], and incident coronary heart disease [32].

105 Second, it has also been found that the negative effects of job insecurity on health indicators  
106 and life satisfaction are greater in workers with low levels of employability or lack of opportunities  
107 to find a new job in case of losing the current one [31]. These effects are compounded when people  
108 are over 40 years of age [33].

109 Finally, an indirect effect of job insecurity on health can occur when people reduce their  
110 investments in health so they can save in order to cope with a possible job loss. Although this

111 potential effect could only be verified in the long term [31], it is important to consider it as a factor  
112 that increases the accumulated vulnerability of workers with fewer resources, since there is evidence  
113 [34] that job insecurity also affects negatively daily consumption and some major life decisions.

114 Based on these rationales and prior data, we formulate the following hypothesis:

115 H1: Perceived job insecurity as a result of the COVID-19 pandemic will have a negative  
116 effect on overall mental health.

## 117 **Consequences of Financial Threat on Mental Health and Health Correlates**

118 Financial threat is an emotional state which refers to “self-reported fearful-anxious  
119 uncertainty regarding one’s current and future financial situation” [35, p. 129; see also [7]. Financial  
120 threat perception, or financial distress, is usually associated with people or households that  
121 experience job insecurity when their jobs are less secure and have low protection against  
122 unemployment [36], and the data confirm that the financial threat is higher for people who  
123 experience a large number of economic difficulties in their daily life [37]. Economic difficulties can  
124 also become a chronic stress situation in families which can generate distressing thoughts about  
125 paying household expenses, and leads to feelings of fear, anxiety and uncertainty regarding one’s  
126 ability to maintain the current standard of living [7, 35]. Financial stress frequently forces high levels  
127 of debt to be incurred through credit cards, loans and mortgages [35]. There is evidence [38] that  
128 the negative effect of job insecurity on perceived health worsens if the person is over-indebted,  
129 Moreover, having non-mortgage debts (i.e., bank cards, loans or medical bills) cause higher levels  
130 of anxiety and damage to health than mortgages [38, 39].

131 Prior research has found that economic insecurity is a socioeconomic determinant of mental  
132 health [40]. Financial threat, preceded or not by debts already incurred, is associated with greater  
133 psychological distress, characterized by higher levels of depression, anxiety and fatigue [35], lower  
134 subjective well-being [41], greater emotional exhaustion and lower psychological well-being [37],  
135 and psychological distress and mental health issues [7]. Additionally, it has been proven that the

136 perception of future financial risk (without future unemployment necessarily occurring) affects  
137 more negatively mental health than real volatility, which also affects all income levels and is more  
138 detrimental for men [40]. Worry and rumination about financial risk can also exacerbate their  
139 negative consequences on mental health, psychological well-being and cognitive functioning [42].  
140 It has also been found that the perception of financial risk mediates the relation between economic  
141 difficulties and suicidal thoughts and cognitive confusion/bewilderment [43], affecting women and  
142 men equally.

143 The combination of job insecurity and financial insecurity or risk has a significant effect on  
144 lower levels of vitality and mental health [8], and it has been demonstrated [44] that in situations of  
145 economic turbulence (such as great crises and recessions, or like the one now caused by the COVID-  
146 19 pandemic), workers perceive a loss of the sense of control [45], so that the negative effects of  
147 job insecurity are even greater on mental health and perceived happiness.

148 Based on these rationales and prior data, we formulate the following hypothesis:

149 H2: Perceived financial threat as a result of the COVID-19 pandemic will have a negative  
150 effect on overall mental health.

## 151 **Perceived Social Support as Buffering in the Relationship between Job Insecurity, Financial** 152 **Threat and Mental Health**

153 Prior research has collected data and solid arguments to show a direct association between  
154 social relations, social support and health [46, 47]. In particular, the hypothesis of the buffer  
155 (protective) effect of the perception of social support on the consequences of stress has a long  
156 trajectory in psychosocial research. In their classic study, [48] found support for the buffer model  
157 when social support refers to the perceived availability of interpersonal resources that respond  
158 directly to the needs of people who are experiencing stressful events. Given that both job insecurity  
159 and financial threats constitute powerful work-related stressors [7, 17-18, 35], identifying the

160 potential moderating effect of the perceived social support from a person's social network is of great  
161 relevance to offsetting the negative consequences of both for health.

162 Theoretical models [30] and previous studies have suggested and demonstrated that social  
163 support buffers the negative effects of job insecurity on work outcomes, such as job satisfaction and  
164 vigor [49], and on well-being and mental health [12-14]. It has also been found that women use this  
165 social resource more often and more efficiently than men [50]. These results were confirmed in a  
166 recent study [51] that showed when women actively resort to their social support network, this acts  
167 as a buffer for the negative consequences of job insecurity. These conclusions agree with those  
168 proposed by [48] that the effectiveness of this interpersonal-social resource depends on it serving  
169 specifically to manage the stressful situation. However, another recent study [52] clarified previous  
170 results that supported the buffer effect of the perception of social support, as they showed that the  
171 negative relation between job insecurity and psychological well-being is reduced when the  
172 perception of job insecurity is low, but not when it is high.

173 As already we mentioned, there is also empirical evidence of the buffer role of tangible social  
174 support in the relation between financial stress and psychological well-being and psychosomatic  
175 disorders [15], and in the relation between financial stress and alcohol-related behaviors (drinking  
176 to deal with problems, excessive consumption of alcohol and problems with alcohol) [53]. The  
177 buffer effect has been verified for both instrumental and emotional social support [16]. These last  
178 results lead to the assumption that instrumental support can serve as a strategy centered on  
179 confronting the problem, whereas emotional support can be used as strategy centered on negative  
180 emotional responses, relations that may be of importance in the design of interventions to reduce to  
181 the negative effects of insecurity and financial threats.

182 Based on these rationales and prior data, we formulate the following hypothesis:

183 H3: The perception of social support linked to the size of the social network will mitigate  
184 the relations between perceived job insecurity and financial threat as a result of the COVID-  
185 19 pandemic, and overall mental health.

186

## Materials and Methods

187 The proposed hypotheses involve contrasting the existence of a relation between the  
188 variables in the context of the COVID-19 pandemic. No questions are considered about the point at  
189 which the relation between the variables begins or how long they last. Consequently, to prove the  
190 hypotheses, a cross-sectional correlational study was conducted on a non-probabilistic sample  
191 aimed at a general Chilean adult population. The project underwent assessment by the Ethics and  
192 Bioethics Committee of the Universidad de Concepción (CEBB 650-2020, March 2020), and the  
193 participants were asked to sign an informed consent.

### 194 Participants

195 A sample of 591 participants took part in the study (592 responses to the online questionnaire  
196 were obtained, of which a duplicate case identified through e-mail was eliminated) with an average  
197 age of 37.63 years ( $SD = 12.85$ ). 76 % were female ( $n = 449$ ), 23.7% were male ( $n = 140$ ), and 0.3%  
198 identified as another gender ( $n = 2$ ). All the participants lived in Chile, with the Regions of Bio-Bio  
199 ( $n = 213$ ; 36%), Metropolitan ( $n = 137$ ; 23.2%), La Araucanía ( $n = 121$ ; 20.5%), Valparaíso ( $n =$   
200 36; 6.1%), and Los Lagos ( $n = 17$ ; 2.9%) being the most represented. Most of the participants during  
201 the study had a full-time day job ( $n = 269$ ; 45.5%), but they also had part-time jobs ( $n = 43$ ; 7.3%),  
202 were independent workers ( $n = 82$ ; 13.9%), students ( $n = 79$ ; 13.4%), unemployed ( $n = 55$ ; 9.3%),  
203 retired ( $n = 30$ ; 5.1%), homemakers ( $n = 24$ ; 4.1%) and others ( $n = 9$ ; 1.5%). 68.2% ( $n = 403$ ) had  
204 a partner during the study. Participants had an average of 1.28 children ( $SD = 9.74$ ). 93.1% lived in  
205 an urban area ( $n = 550$ ) and 6.9% in the country ( $n = 41$ ). 37.6% ( $n = 222$ ) reported having graduate  
206 studies, 43.3% ( $n = 256$ ) undergraduate studies, 8.3% ( $n = 49$ ) technical-professional studies, 10.7%  
207 ( $n = 63$ ) had high school and 0.2% ( $n = 1$ ) elementary school.

### 208 Procedure

209 The Government of Chile began to decree social distancing and confinement measures on  
210 March 16, 2020, and they progressively increased restrictions on productive, commercial and  
211 consumption activities as different regions detected contagions and deaths. The data were collected



212 via an online questionnaire (Questionpro) between March 24 and April 23. Our recruitment strategy  
213 was a combination of professional networks, social networks, professional associations,  
214 undergraduate and graduate students and personal contacts, who were invited to participate and  
215 disseminate this invitation among their network of contacts (snowball strategy). When the proposed  
216 conditions were agreed upon, the participants marked a square indicating they were over 18 years,  
217 had been informed and understood the nature of this study and their decision to participate  
218 voluntarily. The battery of questionnaires included other instruments not considered in the present  
219 work as they deal with a complementary line of enquiry. The participants took an average of 27  
220 minutes to complete all the instruments. When necessary, they could save their progress and take it  
221 up again when convenient.

## 222 **Instruments**

223 *Job Insecurity.* To measure the perception of job insecurity, the Job Insecurity Scale developed by  
224 [27] was used, adapted and validated in Spanish [20] that includes four items (e.g., “I fear that I  
225 might lose my job”) scored on a 6-point Likert scale (1 = Strongly disagree, to 6 = Strongly agree).  
226 The instrument showed good internal consistency (Cronbach’s  $\alpha = 80.1$ ).

227 *Financial Threat.* The perception of financial threat was measured with the Financial Threat Scale  
228 adapted to Spanish [37]. This instrument contains six items (e.g., “How much do you feel threatened  
229 by your financial situation?”) that are evaluated on a 5-point Likert scale (1 = *Not at all*; 5 = A great  
230 deal). The scale showed good internal consistency (Cronbach’s  $\alpha = 91.8$ ).

231 *Overall mental health.* To measure the participants’ perception of overall mental health, the 12-item  
232 version of the General Health Questionnaire was used [54] in its version previously applied in Chile  
233 [55, 56]. This instrument is widely used as mental health screening [57]. It contains 12 questions  
234 (e.g., “Are you able to concentrate on what you do?”, “Have you felt constantly under strain?”,  
235 “Have you felt unhappy or depressed”) which is answered on a 4-point Likert scale (1 = *Never*; 2 =  
236 *Sometimes*; 3 = *Often*; 4 = *Always*), where high scores express greater decline in perceived overall  
237 mental health. Although at times in the literature more than one underlying factor has been detected,

238 the structure of the instrument is recognized as essentially one-dimensional, which is why this is the  
239 recommended mode of use [57]. The analyses revealed good internal consistency (Cronbach's *alpha*  
240 = 88.5).

241 *Social support*. To estimate the size of the social support network, the question "Approximately,  
242 how many close friends or relatives do you have? (people with whom you get along and can talk to  
243 about everything that is happening)" was used. This item is part of the MOS social support survey  
244 [58], also widely used in Spanish and in the Chilean context (e.g., [59]).

## 245 **Data Analysis Strategy**

246 First, the factorial structure of the instruments was tested, applying confirmatory factor  
247 analysis (CFA) using JASP software version 0.11.1 (extraction methods used: maximum likelihood  
248 estimation, VARIMAX rotation), and the following indices were used for goodness of fit:  $\chi^2/df$ ,  
249 RMSEA, SRMR, CFI, and TLI.

250 Second, along with previous analyses, the Harman test was applied to estimate possible  
251 common-method variance effects for all items in the study [60]. Third, once all the above were  
252 performed, the bivariate Pearson correlation was used to test the relationship between variables.  
253 Finally, to contrast the moderation hypothesis, Hayes's macro [61] was applied using IBM SPSS  
254 24 software.

## 255 **Results**

256 In order to test the factor structure of the instruments, two CFAs was performed: the first  
257 analyzed the empirical structure of the data on the instruments of job insecurity along with the  
258 general health scale (N = 394; which corresponds to the participants who completed this scale, minus  
259 nine subjects self-categorized as "other occupational status", i.e., the workers with full and part-time  
260 contracts and independent workers were considered in the analysis); the second model contains the  
261 financial threat scale along with the general mental health scale for the total sample. In both models  
262 the two latent variables freely covariate. As seen in Table 1, the goodness of fit indices used ( $\chi^2/df$ ,  
263 SRMR, CFI, TLI) show a general good fit for the structure of the instruments, with the exception of

264 RMSEA, which is acceptable. In the case of  $\chi^2 / df$  ratio, the result is very sensitive to large sample  
 265 sizes, as is the case of the present study. However, according to the combination of adjustment index  
 266 criteria established by [62], it can be argued that there is an adequate adjustment of the factorial  
 267 structure of the instruments after ruling out one of the six items on the financial threat scale (How  
 268 much do you think about your financial situation?), and two items on the general mental health scale  
 269 (Have you felt that you are playing a useful role in life? and, Have you felt able to make decisions?),  
 270 whose modification indexes indicated that its removal would allow a better adjustment of the data  
 271 to the theoretical structure, which could be due to some level of redundancy in item content. The  
 272 elimination of these items complies with the recommendation of not exceeding the twenty percent  
 273 of them [63].

274 **Table 1. Results of the CFA for the instruments.**

| Model                                                                                                   | $\chi^2$ | Df  | $\chi^2/df$ ratio | SRMR | RMSEA | CFI  | TLI  |
|---------------------------------------------------------------------------------------------------------|----------|-----|-------------------|------|-------|------|------|
| Work Insecurity (4 items) –<br>General Mental Health (12 items)                                         | 442.290  | 103 | 4.300             | .068 | .092  | .868 | .847 |
| Work Insecurity (4 items) – General<br>Mental Health (10 items; eliminating 3<br>and 4)                 | 261.378  | 76  | 3.439             | .055 | .079  | .918 | .902 |
| Financial Threat (6 items) – General<br>Mental Health (12 items)                                        | 724.734  | 134 | 5.408             | .069 | .099  | .864 | .844 |
| Financial Threat (5 items, eliminating 5)<br>– General Mental Health (10 items;<br>eliminating 3 and 4) | 301.762  | 89  | 3.391             | .053 | .073  | .939 | .929 |

275 *Note:*  $N = 591$ ; SRMR = Standardized Root Mean Residual; RMSEA = Root Mean Square Error of  
 276 Approximation; CFI = Comparative Fit Index; TLI = Tucker-Lewis Index.

277

278 To control the effect of common method variance (CMV), strategies were taken *a priori* and  
 279 *post hoc*. Regarding the *a priori* strategy, it should be borne in mind that the scale formats for the  
 280 different variables analyzed were different, which prevents the effects derived from CMV [64].  
 281 Regarding the *post hoc* strategy, we carried out the Harman single factor test [65]. This is the most  
 282 widely used method to examine the pernicious presence of CMV [60, 66]. The results showed that  
 283 this first single factor explains 24.43% of the variance, considerably less than the 50% from common  
 284 variance; thus, CMV does not seem to affect correlations among the studied variables. Furthermore,  
 285 Table 2 shows the descriptive statistics of the variables included in this study, as well as the  
 286 respective Cronbach's *Alpha* and McDonald's *Omega*, which were reasonable (Table 2).

287 In order to test H1 and H2 bivariate correlations were run. As Table 2 shows, all of the study  
 288 variable were significantly correlated, and particularly mental health was negatively related to both  
 289 perceived work insecurity ( $r = -2.14, p < 0.05$ ) and financial threat ( $r = -.335, p < 0.05$ ), so H1 and  
 290 H2 were accepted.

291 **Table 2. Cronbach's Alpha, McDonald's Omega, Means, standards deviation and**  
 292 **correlations.**

|                        | $\alpha$ | $\omega$ | Mean | SD   | Work Insecurity | Financia l Threat | Social Support Network | General Mental Health |
|------------------------|----------|----------|------|------|-----------------|-------------------|------------------------|-----------------------|
| Work Insecurity        | .886     | .892     | 3.04 | 1.48 | 1               | .576**            | -.074                  | -.199**               |
| Financial Threat       | .911     | .914     | 3.04 | 1,10 |                 | 1                 | -.111**                | -.343**               |
| Social Support Network | ---      | ---      | 8.14 | 8,25 |                 |                   | 1                      | .198**                |
| General Mental Health  | .875     | .877     | 2.93 | .55  |                 |                   |                        | 1                     |

293 Note: \*  $p < .05$  \*\*  $p < .01$ .

294 In order to test H3, a moderation analysis of social support network in the relationship  
 295 between dependents and independents variables was carried out, controlling the effect of the  
 296 variables sex, age and educational level (Table 3). From here, all the analyzes that account for direct  
 297 effects and moderations use the scores of the independent variables transformed into z-scores.  
 298 Results showed that the overall model significantly explained general mental health ( $F(6, 387) =$   
 299  $8.56, p < .001, R^2 = .12$ ). As shown in Table 3, both work insecurity and social support network  
 300 predicted general mental health, and the interaction (moderation) between them contributed  
 301 significantly to this explanation ( $F(1, 387) = 10.40, p = .001, R^2 = .024$ ), supporting H3.

302 **Table 3. Moderation model of social support on work insecurity and general mental health.**

| Variables | Coefficient | t      | p    | LI    | LS    |
|-----------|-------------|--------|------|-------|-------|
| Constant  | 2.439       | 12.459 | .000 | 2.054 | 2.824 |
| SSN       | .114        | 4.392  | .000 | .063  | .165  |
| WI        | -.082       | -3.379 | .001 | -.130 | -.034 |
| SSNxWI    | .100        | 3.225  | .001 | .039  | .162  |
| SX        | .096        | 1.771  | .077 | -.011 | .203  |
| AG        | .004        | 1.466  | .144 | -.001 | .009  |
| EL        | .060        | 1.696  | .091 | -.010 | .130  |

303 *Note:* 95% confidence level. SSN = Social Support Network, WI = Work Insecurity, SX = Sex, AG  
 304 = Age, EL = Educational Level.

305

306 Figure 1 shows the effect of work insecurity over general mental health, in presence of social  
 307 support network. It is possible to see that when social support network is high, the effect of work  
 308 insecurity on general mental health is not significant.

309

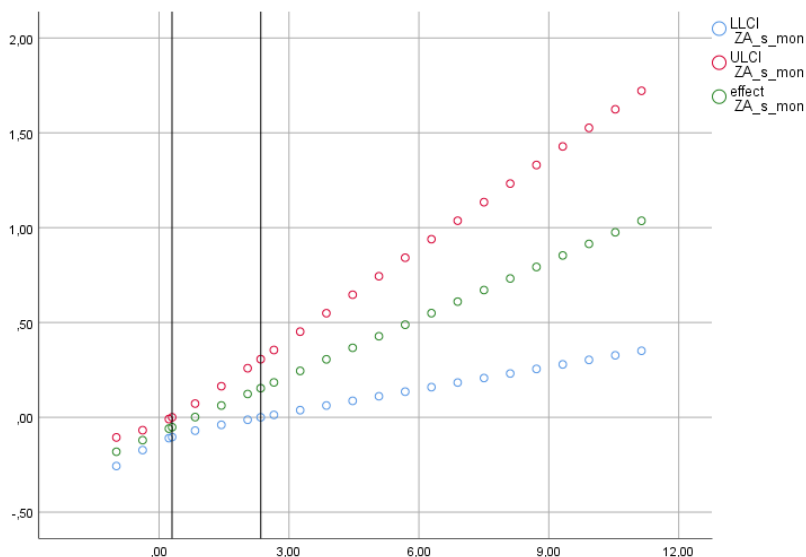

Region of NO significance

310  
311  
312  
313

314 **Figure 1. Conditional effect of work insecurity on perceived general mental health.**

315 Next, we tested the moderation of social support network in the relationship between  
316 financial threat as independent variable, and general mental health as dependent variable,  
317 controlling the effect of the variables sex, age, and educational level. Results showed that the  
318 overall model significantly explained general mental health ( $F(6, 583) = 24.22, p < .001, R^2 =$   
319  $.20$ ). As shown in Table 3, both financial threat and social support predicted general mental health  
320 and, supporting H3, the interaction (moderation) between them contributed significantly to this  
321 explanation ( $F(1, 583) = 5.55, p = .018, R^2 = .008$ ).

322 **Table 4. Moderation model of social support on financial threat and general mental health.**

| Variables | Coefficient | T      | P    | LI    | LS    |
|-----------|-------------|--------|------|-------|-------|
| Constant  | 2.354       | 20.453 | .000 | 2.128 | 2.580 |
| SSN       | .096        | 4.217  | .000 | .052  | .141  |
| FT        | -.161       | -7.726 | .000 | -.202 | -.120 |
| SSNxFT    | .042        | 2.357  | .018 | .007  | .078  |
| SX        | .100        | 2.132  | .033 | .008  | .192  |
| AG        | .008        | 4.629  | .000 | .004  | .011  |
| EL        | .040        | 1.764  | .078 | -.004 | .084  |

323 *Note:* 95% confidence level. SSN = Social Support Network, FT = Financial Threat, SX = Sex, AG  
324 = Age, EL = Educational Level.

325

326 As Figure 2 shows, the effect of financial threat on perceived general health is buffered by  
327 social support network, that is, when social support network is high, the effect of financial threat on  
328 perceived general mental health is not significant.

329

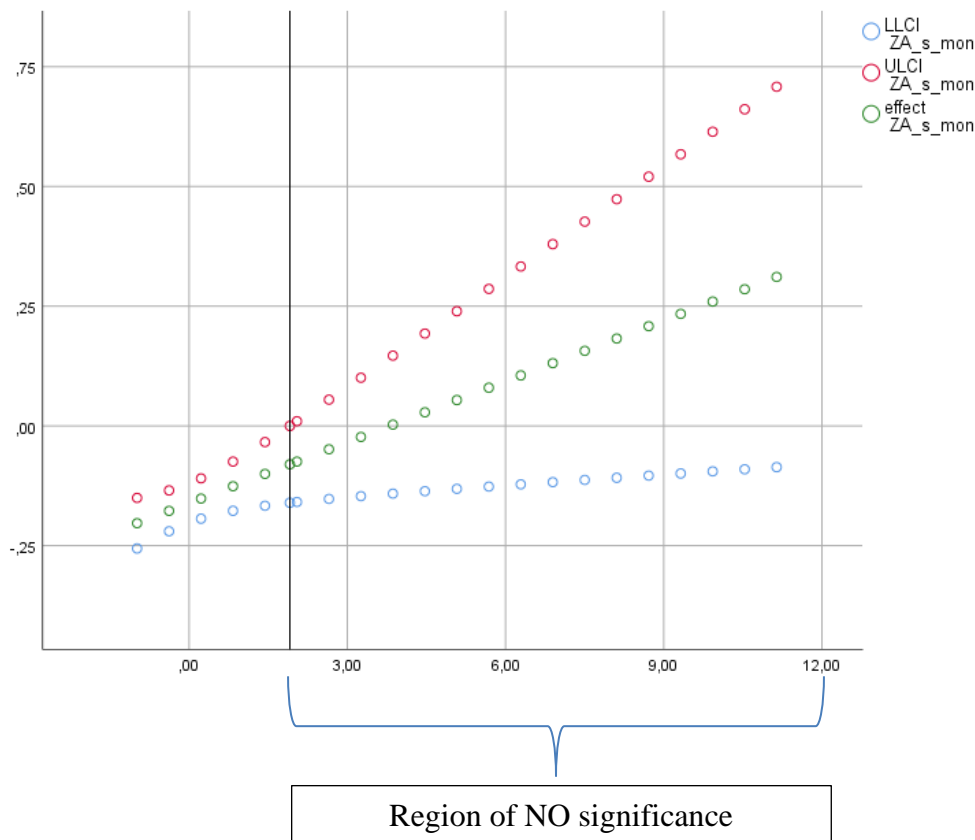

330  
331  
332  
333  
334

335 **Figure 2. Conditional effect of financial threat on general mental health.**

336

337

### Discussion

338 As the months pass, the effects of ‘Corononomics’ [1] are amplifying the devastating effects  
339 on health that COVID-19 is causing. By the mid-July, Chile was the eighth country of the world in  
340 number of deaths per number of inhabitants with a rate of 45.40 deaths per 100,000 inhabitants [67].  
341 In April, the World Bank estimated that Chile’s economic activity could shrink up to 3.3% in 2020,  
342 accompanied by a significant reduction in trade flows, consumption and the price of raw materials,  
343 especially copper, which will result in increased unemployment and poverty rates [68]. The data  
344 from our study indicate that people already perceived this impact during first stage of the pandemic

345 through job insecurity and financial threat, and that these perceptions related negatively to their  
346 overall mental health, as is discussed next.

347 First, the measurement of global job insecurity [17, 20] indicates that this issue is perceived  
348 as a threat in Chile in the context of the COVID-19 pandemic, although the overall mean value is  
349 not high. It is possible that the education level of the sample, with a predominance of university  
350 graduates, is related to a perception of greater employability, which helps to relativize the perception  
351 of job insecurity and its negative psychological consequences [69, 70]. However, there are studies  
352 that have not identified a buffer effect of employability on the positive relation between job  
353 insecurity and the deterioration of psychological well-being [71].

354 The results show a statistically significant relation between job insecurity and mental health,  
355 which agrees with the evidence obtained in other socioeconomic contexts [19, 28-29] and makes it  
356 possible to verify that this relation is consistent across countries and cultures. The current situation  
357 brought about by COVID-19 fulfills two of the conditions that characterize job insecurity according  
358 to [23] –lower control and lower volition– since the impact generated by the pandemic has been  
359 sudden and uncontrollable for governments and for organizations and workers alike. Although the  
360 potential effect of the third of these – longer duration [23] –will possibly be proven later on, it must  
361 be remembered that Chile had undergone the effects of the “social uprising” in October and  
362 November 2019 and its consequences for economic and social activities, which could also contribute  
363 to increase the perception of job insecurity as the two effects are now combined. Accordingly, it is  
364 important to warn of the potential development of post-traumatic stress and the declining on mental  
365 health in the medium and long term [72, 73] if the adverse social and employment conditions persist  
366 or even become more acute, especially in the most vulnerable groups and sectors with greater  
367 psychosocial and material needs.

368 Second, in the same direction, the outcomes show a perception of financial threat at values  
369 slightly above the midpoint of the scale. The relatively rapid measure approved by the Chilean  
370 Senate and Congress to make unemployment insurance more flexible due to the Covid-19



371 emergency (March 31), which extended coverage for the most vulnerable sectors, could contribute  
372 to control the perception of immediate financial risk, even if it is on a relatively small scale.  
373 However, the results show a statistically significant relation with mental health, which agrees with  
374 previous evidence after the effects of large economic recessions [7, 35, 37, 41]. This conclusion is  
375 relevant because it is consistent with the increasing body of evidence (e.g. [40]) that economic  
376 insecurity is experienced the same regardless of income distribution, with identical effect of  
377 psychological distress.

378 In previous crisis brought about by epidemics and pandemics, the effects of financial threat  
379 are detected both during the quarantine period and, especially, in the medium and long term [74,  
380 75]. As a result, if the outcomes of our study show that the mean levels of financial threat are already  
381 associated with declining mental health in the first stage of the COVID-19 pandemic, it is  
382 foreseeable that when the current situation is prolonged, the economic stressors will increase, with  
383 the potential consequent deterioration in well-being and psychological health. Prior research is  
384 consistent in showing that the negative and adverse effects of repeated financial threat [76],  
385 associated with both job insecurity and unemployment, are multiple and severe [77] for people and  
386 their personal and social environments – affecting in particular social relations and family  
387 functioning [78]; therefore, the outcomes obtained in this study can serve to warn of the foreseeable  
388 consequences for mental health in an employment and economic situation that may continue over  
389 time.

390 The results show that the perceptions of job insecurity and financial threat are significantly  
391 related to each other, which agrees with what has been found in previous studies [8, 44] in situations  
392 of recent large-scale economic crises. In addition, both are associated with a decline in perceived  
393 mental health, which is also consistent with prior results (e.g. [8, 40, 77]). However, our data  
394 indicate that the financial threat is slightly more negatively related to mental health ( $r = -.335$ ) than  
395 to job insecurity ( $r = -.214$ ). These results agree in part with the prior evidence [30], but not with  
396 the results obtained by [8] in the context of the Great Recession of 2008 in European countries,

397 where they verified that job insecurity and financial worries affected mental health the same. Nor  
398 are they in line with those obtained in Sweden by [79], who confirmed job dependency due to  
399 economic issues did not mitigate the relation between job insecurity and psychological well-being.  
400 These discrepancies with some prior results may be because in Chile social protection systems are  
401 much less robust than those generally available in European Union countries with welfare states [8],  
402 and in particular in Sweden [79], and they may be close to those that predominate in the US [30].  
403 Thus, in Chile, where the population generally carries high debt levels and a fragile unemployment  
404 insurance system, people who view their financial situation with concern are more job-dependent  
405 and react more negatively to the threat, which is reflected in their mental health. In this sense, we  
406 argue that the moderating effect of the social support network will be less if the person who works  
407 is responsible for a larger number of people. In order to analyze it, we performed a hierarchical  
408 regression, segmenting the file into two groups (1 or fewer dependents = group 1; two or more  
409 dependents = group 2,  $n_s = 261$  and  $131$  respectively) to verify the direct effects of financial threat,  
410 social support network and their interaction on overall mental health. In line with the previous  
411 reasoning, the results showed that in both groups direct significant regression weights of financial  
412 threat and social support network appear on overall mental health ( $\beta_s > .108$ ,  $p_s < .005$ ), but that the  
413 interaction is only related to a lower level of damage to mental health in the group of up to one  
414 dependent ( $\beta_s = .087$  and  $.000$ ,  $p_s = .002$  and  $.996$ , for groups 1 and 2, respectively). Additionally,  
415 the percentage of variance explained by these models is greater in group 2 than in group 1 ( $R^2 =$   
416  $.166$  and  $.123$ , respectively), which is why these variables to a large extent explain the worsening of  
417 overall mental health in the group with more dependents. Prior results [40] also show that the  
418 negative effects of economic insecurity are greater in men, who for socioeconomic and cultural  
419 reasons continue to be the main providers in families, as can also occur in Chile.

420 Finally, the study results indicate a moderate buffer effect of perceived social support relative  
421 to the size of the social network. Thus, in relation to job insecurity and financial threat, the network  
422 size mitigates the association of both with the decline in perceived mental health. These results are

423 similar to those obtained in previous studies in relation to both constructs [12-16, 49], and reinforce  
424 the value of social support as a resource to cope with stressful experiences beyond specific situations  
425 and contexts. Although the network size of the participants is not high (mean 8.13 average), what  
426 seems important is the perceived effectiveness of this network to manage job insecurity and financial  
427 threat. When asking for the number of people who form their support network, we were  
428 investigating not only the size of the social network, but also the cohesion of the network and the  
429 type of close relations (i.e., primary and strong bonds) that people establish in them. Both factors  
430 directly affect the reception of various types of social support [80], so that the participants seem to  
431 perceive that the social network is a powerful resource to cope with financial stress and job  
432 insecurity. In addition to this direct influence, the perception of the support network may also  
433 expand through the experience of trust, where its members increase their social capital through their  
434 own contacts.

#### 435 **Practical implications**

436 The outcomes obtained have direct practical implications related to the need to implement  
437 psychological support measures for workers and the unemployed in order to equip them with coping  
438 strategies to manage uncertainty and stress. These psychosocial supports should be available in  
439 organizations and primary care centers so they can be accessible and have a restraining effect on the  
440 most serious mental health consequences in the medium and long term [72].

441 Second, the conclusions drawn here should serve as an alert to the risk that the double  
442 perception of job insecurity and financial threat can generate by increasing the psychological  
443 pressures of productivity, one of the first consequences that has already been detected since the  
444 pandemic began [81]. The demands, explicit or implicit, that people respond to the challenges  
445 caused by the COVID-19 crisis with work overload, increasing their working days (in person or  
446 remotely), reducing or giving up their days off or vacation days, and accepting abusive working  
447 conditions, can also increase the perception of qualitative job insecurity [21], lower perceived  
448 control and the resulting negative effects on mental and physical health [82]. Thus, it seems urgent

449 to regulate and monitor compliance with working conditions during the COVID-19 crisis and the  
450 call for “the new normal”, as well as to guarantee the rights of workers and the unemployed, to  
451 maintain adequate levels of well-being and physical and mental health, and to reduce other negative  
452 psychosocial consequences such as the work-family conflict.

453 Third, the results also have important implications for the design of strategies and  
454 psychosocial interventions that can strengthen social networks and the potential social support they  
455 involve. Given the strong bond between social relations, support and mental health [46-47], actions  
456 aimed at reinforcing interpersonal relations and social networks through, for example, support  
457 groups, community initiatives or networks of people who share similar characteristics (studies,  
458 profession, etc.) [83] can be highly effective at equipping those who experience financial threat and  
459 job insecurity with social coping and resilience resources that increase personal resources. Despite  
460 being subjective perceptions, financial and job insecurity have objective components and,  
461 consequently, are not an *individual* but a collective problem; therefore, the possible tools to confront  
462 them will also need to be collective and social.

### 463 **Limitations and Future Research**

464 Although the result of Harman’s test indicates the absence of common-method variance  
465 effects, the cross-sectional nature of the design only allows us to identify relations between the  
466 variables, although these relations were statistically significant. However, despite this limitation,  
467 the importance of having preliminary data on the disruptive impact caused by the scale and speed  
468 of the global pandemic in Chile justifies the urgency of obtaining an initial approach of the  
469 consequences for mental health of work-related variables. Indeed occupational health, job insecurity  
470 and job precariousness are three of the ten key areas for research and practice in WOP due to the  
471 impact on them by COVID-19 as identified by experts (Rudolph et al., 2020); thus, this study makes  
472 an important contribution to knowledge in this context, but it must be broadened or complemented.

473 In this regard, our aim is to continue collecting data on these variables so that longitudinal  
474 studies can establish causal relations among them, and to learn with greater precision the long-term  
475 effects and perceptions of financial threat and psychological insecurity on mental health.

476 Third, the participants in our study did not form part of a probabilistic sample, so that the  
477 outcomes cannot be generalized to the Chilean population. Also in this case, future studies will have  
478 to try to access representative samples, or concentrate groups of workers, specific people or contexts  
479 (concrete professions, young or older workers or vulnerable groups, etc.) in order to most accurately  
480 identify the differential effects of ‘Corononomics’ [1] in each setting.

481 Finally, this study has only considered the variables mentioned as moderating antecedents  
482 and consequents, but we are aware that in the experiences and the outcomes that people are living  
483 during this economic and health crisis other personal, family, organizational and social variables are  
484 involved that interact in a complex way, which is reflected in the percentage of variance explained  
485 by the contrasted models not exceeding 20%. Their inclusion in future studies will be needed to  
486 understand the real impacts and to design strategies and interventions that can prevent, reduce or  
487 alleviate the effects for the well-being, health and safety of people and their families as well as for  
488 the functioning and effectiveness of organizations.

#### 489 **Data availability**

490 The data corresponding to this study is available on Open Science Framework (OSF) website  
491 (<https://osf.io/p7xdf/>) [84].

#### 492 **Acknowledgments**

493 This research has been supported by project CONICYT MEC CON80190085 (Chile), and  
494 by Research Directorate (DIUFRO) of the Universidad de La Frontera (Chile).

495

496

#### **References**

- 497 1. Eichengreen B. Coronanomics 101: which policy tools will contain the economic threat of  
498 COVID-19? World Economic Forum, 2020 Mar 12. Available from:  
499 <https://www.weforum.org/agenda/2020/03/coronavirus-economics/>
- 500 2. Barua S. Understanding Coronanomics: The economic implications of the coronavirus  
501 (COVID-19) pandemic. MPRA Paper No. 99693, posted 2020 Apr 20. Available from:  
502 [https://papers.ssrn.com/sol3/papers.cfm?abstract\\_id=3566477](https://papers.ssrn.com/sol3/papers.cfm?abstract_id=3566477)
- 503 3. Burgard SA, Brand JE, House JS. Perceived job insecurity and worker health in the United  
504 States. *Soc Sci Med.* 2009; 69: 777-785.
- 505 4. De Witte H. On the scarring effects of job insecurity (and how they can be explained). *Scan*  
506 *J Work Environ Health.* 2016; 42: 99-102.
- 507 5. Lübke C. How self-perceived job insecurity affects health: Evidence from an age-  
508 differentiated mediation analysis. *Econ. Ind. Dem.* 2019 Forthcoming.
- 509 6. Kiely KM, Leach LS, Olesen SC, Butterworth P. How financial hardship is associated with  
510 the onset of mental health problems over time. *Soc Psych & Psych Epidem: Int J Res Soc*  
511 *Gen Epidem Ment Health Serv.* 2015; 50: 909-918.
- 512 7. Marjanovic Z, Greenglass ER, Fiksenbaum L, Bell CM. Psychometric evaluation of the  
513 Financial Threat Scale (FTS) in the context of the great recession. *J Econ Psych.* 2013; 36:  
514 1-10.
- 515 8. Rajani NB, Giannakopoulos G, Filippidis FT. Job insecurity, financial difficulties and  
516 mental health in Europe. *Occup Med.* 2016; 66: 681-683.
- 517 9. László KD, Pikhart H, Kopp MS, Bobak M, Pajak A, Malyutina S, Salavec G, Marmot M.  
518 Job insecurity and health: A study of 16 European countries. *Soc Sci Med.* 2010; 70: 867-  
519 874.
- 520 10. Yip PSF, Yang KCT, Ip BYT, Law YW, Watson R. Financial debt and suicide in Hong  
521 Kong SAR. *J Appl Soc Psychol.* 2007; 37: 2788-2799.

- 522 11. Mauno S, Cheng T, Lim V. The far-reaching consequences of job insecurity: A review on  
523 family-related outcomes. *Marr Family Rev.* 2017; 53: 717-743.
- 524 12. Näswall K, Sverke M, Hellgren J. The moderating effects of work- based and non-work  
525 based support on the relation between job insecurity and subsequent strain. *SA J Indus*  
526 *Psychol.* 2005; 31: 57-64.
- 527 13. Snow DL, Swan SC, Raghavan C, Connell CM, Klein I. The relationship of work stressors,  
528 coping and social support to psychological symptoms among female secretarial employees.  
529 *Work Stress.* 2003; 17: 241-263.
- 530 14. Lim VKG. Job insecurity and its outcomes: Moderating effects of work-based and nonwork-  
531 based social support. *Hum Relat.* 1996; 49: 171-194.
- 532 15. Åslund C, Larm P, Starrin B, Nilsson KW. The buffering effect of tangible social support  
533 on financial stress: Influence on psychological well-being and psycho-somatic symptoms in  
534 a large sample of the adult general population. *Int J Equity Health.* 2014; 13: 85-93.
- 535 16. Whelan CT. The role of social support in mediating the psychological consequences of  
536 economic stress. *Soc Health Illness,* 1993; 15: 86-101.
- 537 17. De Witte H. Job insecurity: Review of the international literature on definitions, prevalence,  
538 antecedents and consequences. *SA J Ind Psychol.* 2005; 31: 1-6.
- 539 18. Sverke M., Hellgren J. The nature of job insecurity: Understanding employment uncertainty  
540 on the brink of a new millennium. *Appl Psychol: An Int Rev.* 2002; 51: 23-42.
- 541 19. Sverke M, Hellgren J, Näswall K. No security: A meta-analysis and review of job insecurity  
542 and its consequences. *J Occup Health Psychol.* 2002; 7: 242-264.
- 543 20. Vander Elst T, De Witte H, De Cuyper N. The Job Insecurity Scale: A psychometric  
544 evaluation across five European countries. *Eur J Work Org Psychol.* 2014; 23: 364-380.
- 545 21. Hellgren J, Sverke M, Isaksson K. A two-dimensional approach to job insecurity:  
546 Consequences for employee attitudes and well-being. *Eur J Work Org Psychol.* 1999; 8:  
547 179-195.

- 548 22. Gallie D, Felstead A, Green F, Inanc H. The hidden face of job insecurity. *Work Employ*  
549 *Soc.* 2017; 31: 36-53.
- 550 23. Shoss MK. Job insecurity: An integrative review and agenda for future research. *J Manage.*  
551 2019; 43:1911-1939.
- 552 24. De Cuyper N, Piccoli B, Fontinha R, De Witte H. Job insecurity, employability and  
553 satisfaction among temporary and permanent employees in post-crisis Europe. *Econ Ind*  
554 *Dem.* 2019; 40: 173-192.
- 555 25. De Witte H, Vander Elst T, De Cuyper N. Job Insecurity, Health and Well-Being. In Vuori  
556 J, Blonk R, Price RH, editors. *Sustainable Working Lives, Aligning Perspectives on Health,*  
557 *Safety and Well-Being.* Cham: Springer; 2015. pp. 109–128
- 558 26. Jiang L, Lavaysse LM. Cognitive and affective job insecurity: A meta-analysis and a primary  
559 study. *J Manage.* 2018; 44: 2307-2342.
- 560 27. De Witte H. Arbeidsethos en jobonzekerheid: Meting en gevolgen voor welzijn,  
561 tevredenheid en inzet op het werk [Work ethic and job insecurity: Assessment and  
562 consequences for wellbeing, satisfaction and performance at work]. In Bouwen R, De Witte  
563 K, De Witte H, Taillieu T, editors. *Van groep naar gemeenschap [From group to*  
564 *community]. Liber Amicorum Prof. Dr. Leo Lagrou.* Leuven, Belgium: Garant; 2000. pp.  
565 325-350.
- 566 28. Cheng G, Chan D. Who Suffers More from Job Insecurity? A Meta-Analytic Review. *Appl*  
567 *Psychol: An Int Rev.* 2008; 57: 272-303.
- 568 29. Llosa JA, Menéndez-Espina S, Agulló-Tomás E, Rodríguez-Suárez J. Job insecurity and  
569 mental health: A meta-analytical review of the consequences of precarious work in clinical  
570 disorders. *Anales Psicol* 2018; 34: 211-223.
- 571 30. Greenhalgh L, Rosenblatt Z. Job insecurity: Toward conceptual clarity. *The Acad Manage*  
572 *Rev.* 1984; 9: 438-448.



- 573 31. Caroli E, Godard M. Does job insecurity deteriorate health? *Health Econo.* 2016; 25: 131-  
574 147.
- 575 32. Virtanen M, et al. Perceived job insecurity as a risk factor for incident coronary heart disease:  
576 systematic review and meta-analysis. *BMJ*, 2013; 347:f4746.
- 577 33. Otterbach S, Sousa-Poza A. Job Insecurity, Employability, and Health: An Analysis for  
578 Germany across Generations. *Applied Econo.* 2016; 48: 1303-1316.
- 579 34. Lozza E, Castiglioni C, Bonanomi A. The effects of changes in job insecurity on daily  
580 consumption and major life decisions. *Econo Ind Demo.* 2017. Forthcoming.
- 581 35. Fiksenbaum L, Marjanovic Z, Greenglass E. Financial threat and individuals' willingness to  
582 change financial behavior. *R Behav Finan.* 2017; 9: 128-147.
- 583 36. Giannetti C, Madia M, Moretti L. Job insecurity and financial distress. *Applied Finan Econo.*  
584 2014; 24: 219-233.
- 585 37. Marjanovic Z, Greenglass ER, Fiksenbaum L, De Witte H, Garcia-Santos F, Buchwald P,  
586 Peiró JM, Mañas MA. Evaluation of the financial threat scale (FTS) in four European, non-  
587 student samples. *J Behav Exp Econo.* 2015; 55: 72-80.
- 588 38. Blázquez M, Budría S, Moro-Egido AI. Job Insecurity, Debt Burdens and Individual Health.  
589 IZA Discussion Papers, No. 12663. Bonn: Institute of Labor Economics (IZA); 2019.
- 590 39. Drentea P. Age, debt and anxiety. *J Health Soc Behav.* 2000; 41: 437-450.
- 591 40. Kopasker D, Montagna C, Bender K. Economic Insecurity as a Socioeconomic Determinant  
592 of Mental Health. *SSM - Popul Health.* 2018; 6: 184-194.
- 593 41. Netemeyer RG, Warmath D, Fernandes D, Lynch JG. How am I doing? Perceived financial  
594 well-being, its potential antecedents, and its relation to overall well-being. *J Cons Res.* 2018;  
595 45: 68-89.
- 596 42. de Bruijn EJ, Antonides G. Determinants of financial worry and rumination. *J. Econ Psychol.*  
597 2020; 76: [102233].

- 598 43. Fiksenbaum L, Marjanovic Z, Greenglass E, Garcia-Santos F. Impact of Economic Hardship  
599 and Financial Threat on Suicide Ideation and Confusion. *J. Psychol.* 2017; 151: 477-495.
- 600 44. Lam J, Wen F, Phyllis M. Is Insecurity Worse for Well-being in Turbulent Times? *Mental*  
601 *Health in Context. Soc Men Health.* 2014; 4: 55-73.
- 602 45. Glavin P. The impact of job insecurity and job degradation on the sense of personal control.  
603 *Work Occup.* 2013; 40: 115-142.
- 604 46. House JS, Landis KR, Umberson D. Social relationships and health. *Science.* 1988; 241:  
605 540-545.
- 606 47. Uchino BN. Social support and health: A review of physiological processes potentially  
607 underlying links to disease outcomes. *J Behav Med.* 2006; 29: 377–387.
- 608 48. Cohen S, Wills TA. Stress, social support, and the buffering hypothesis. *Psychol Bull.* 1985;  
609 98: 310-357.
- 610 49. Cheng T, Mauno S, Lee C. Do job control, support, and optimism help job insecure  
611 employees? A three-wave study of buffering effects on job satisfaction, vigor and work-  
612 family enrichment. *Soc Indic Res.* 2014; 118:1269-1291.
- 613 50. Matud MP. Gender differences in stress and coping styles. *Pers Individ Differ.* 2004; 37: 1401-  
614 1415.
- 615 51. Menéndez-Espina S, Llosa JA, Agulló-Tomás E, Rodríguez-Suárez J, Sáiz-Villar R,  
616 Lahseras-Díez HF. Job insecurity and mental health: The moderating role of coping  
617 strategies from a gender perspective. *Front Psychol.* 2019; 10:286.
- 618 52. Giunchi M, Vonthron A-M, Ghislieri C. Perceived job insecurity and sustainable wellbeing:  
619 do coping strategies help? *Sustainability* 2019; 11: 784.
- 620 53. Peirce RS, Frone MR, Russell M, Cooper ML. Financial stress, social support, and alcohol  
621 involvement: A longitudinal test of the buffering hypothesis in a general population survey.  
622 *Health Psychol.* 1996; 15: 38-47.

- 623 54. Goldberg DP, Williams P. A user's guide to the General Health Questionnaire. Windsor:  
624 NFER Nelson; 1988.
- 625 55. Garmendia ML. Análisis factorial: una aplicación en el cuestionario de salud general de  
626 Goldberg, versión de 12 preguntas [Factorial analysis: an application in Goldberg's general  
627 health questionnaire, 12-item versión]. Rev Chil Salud Pub. 2007; 11: 57-65.
- 628 56. Rivas-Diez R, del Pilar Sanchez-Lopez M. Psychometric properties of the general health  
629 questionnaire (GHQ-12) in Chilean female population/Propiedades psicométricas del  
630 cuestionario de salud general (GHQ-12) en población femenina chilena. Rev Argen Clin.  
631 Psicol. 2014; 23: 251-260.
- 632 57. Gnambs T, Staufenbiel T. 2018. The structure of the General Health Questionnaire (GHQ-  
633 12): two meta-analytic factor analyses. Health Psychol Rev. 2018; 12:179-194.
- 634 58. Sherbourne C, Stewart A. The MOS Social Support Survey. Soc Sci Med. 1991; 32: 705-  
635 714.
- 636 59. Poblete F, Glasinovic A, Sapag J, Barticevic N, Arenas A, Padilla O. Apoyo social y salud  
637 cardiovascular: adaptación de una escala de apoyo social en pacientes hipertensos y  
638 diabéticos en la atención primaria chilena [Social support and cardiovascular health:  
639 Adaptation of a scale of social support in hypertensive and diabetic patients in Chilean  
640 primary care]. Aten Prim. 2015; 47: 523-531.
- 641 60. Podsakoff PM, MacKenzie SB, Lee J, Podsakoff N. Common method biases in behavioral  
642 research: A critical review of the literature and recommended remedies. J App Psychol.  
643 2003; 88: 879-903.
- 644 61. Hayes A. Methodology in the social sciences. Introduction to mediation, moderation, and  
645 conditional process analysis: A regression-based approach. New York: Guilford Press; 2013.
- 646 62. Hu L, Bentler P. Cutoff criteria for fit indexes in covariance structure analysis: Conventional  
647 criteria versus new alternatives. Struct Equat Model: A Multidisc J 1999; 6: 1-55.

- 648 63. Kline RB. Principles and practice of structural equation modeling; 2nd edition. New York:  
649 Guilford Press; 2005.
- 650 64. Podsakoff PM, MacKenzie SB, Podsakoff NP. Sources of method bias in social science  
651 research and recommendations on how to control it. Annual Rev. Psychol. 2012; 63: 539-  
652 569.
- 653 65. Chang SJ, van Witteloostuijn A, Eden L. From the editors: Common method variance in  
654 international business research. J Inter Bus Stud. 2010; 41: 178-184.
- 655 66. Tehseen S, Ramayah T, Sajilan S. Testing and controlling for common method variance: A  
656 review of available methods. J Manage Sci. 2017; 4: 142-168.
- 657 67. Johns Hopkins Coronavirus Resource Center (2020). Mortality Analysis. 2020 July 17.  
658 Available from: <https://coronavirus.jhu.edu/data/mortality>
- 659 68. Menz E. Impacto del COVID-19 en la economía de América Latina y Chile. FLACSO-  
660 Chile; 2020 May 28. Available from: [http://www.flacsochile.org/slider/articulo-impacto-  
661 del-covid-19-en-la-economia-de-america-latina-y-chile/](http://www.flacsochile.org/slider/articulo-impacto-del-covid-19-en-la-economia-de-america-latina-y-chile/)
- 662 69. De Cuyper N, Mäkikangas A, Kinnunen U, Mauno S, De Witte H. Cross-lagged associations  
663 between perceived external employability, job insecurity, and exhaustion: Testing gain and  
664 loss spirals according to the Conservation of Resources Theory. J Org Behav. 2012; 36: 770-  
665 788.
- 666 70. Green F. Unpacking the misery multiplier: How employability modifies the impacts of  
667 unemployment and job insecurity on life satisfaction and mental health. J Health Econ. 2011;  
668 30: 265-276.
- 669 71. Kirves K, De Cuyper N, Kinnunen U, Nätti J. Perceived job insecurity and perceived  
670 employability in relation to temporary and permanent workers' psychological symptoms: A  
671 two samples study. Intern Arch Occup Environ Health. 2011; 84: 899-909.

- 672 72. Pfefferbaum B, North, CS. Mental Health and the COVID-19 Pandemic. *The New Engl J*  
673 *Med*; April 13, 2020. Available from:  
674 <https://www.nejm.org/doi/full/10.1056/NEJMp2008017>
- 675 73. Torales J, O'Higgins M, Castaldelli-Maia JM, & Ventriglio A. The outbreak of COVID-19  
676 coronavirus and its impact on global mental health. *Intern J Soc Psych*. 2020; 66: 317-320.
- 677 74. Brooks SK, Webster RK, Smith LE, Woodland L, Wessely S, Greenberg N, Rubin, GJ. The  
678 psychological impact of quarantine and how to reduce it: Rapid review of the evidence.  
679 *Lancet*. 2020; 395: 912-20.
- 680 75. Jeong H, Yim HW, Song Y-J, Ki M, Min J-A, Cho J, Chae J-H. Mental health status of  
681 people isolated due to Middle East respiratory syndrome. *Epidem Health* 2016; 38:  
682 e2016048.
- 683 76. Watson B, Osberg L. Healing and/or breaking? The mental health implications of repeated  
684 economic insecurity. *Soc. Sci Med*. 2017; 188: 119-127.
- 685 77. Klehe U-C, Van Vianen AEM, Zikic J. Coping with economic stress: Introduction to the  
686 special issue. *J Org Behav*. 2012; 33: 745–751.
- 687 78. Probst TM. Economic stressors. In Barling J, Kelloway EK, Frone, MR; editors. *Handbook*  
688 *of Work Stress*. London: Sage; 2005. pp. 267-297.
- 689 79. Richter A, Näswall K, Bernhard-Oettel C, Sverke M. Job insecurity and well-being: The  
690 moderating role of job dependence. *Euro J Work Org Psychol*. 2014; 26: 816-829.
- 691 80. Thoits PA. Mechanisms Linking Social Ties and Support to Physical and Mental Health. *J*  
692 *Health Soc Behav*. 2011; 52: 145-161.
- 693 81. Mukhtar S. Psychological health during the coronavirus disease 2019 pandemic outbreak.  
694 *Int J Soc Psych*. 2020; Forthcoming.
- 695 82. Vander Elst T, Richter A, Sverke M, Näswall K, De Cuyper N, De Witte H. Threat of losing  
696 valued job features: The role of perceived control in mediating the effect of qualitative job  
697 insecurity on job strain and psychological withdrawal. *Work Stress*. 2014; 28: 143-164.

- 698 83. Cohen S, Gottlieb BH, Underwood LG. Social relationships and health. In Cohen S,  
699 Underwood LG, Gottlieb BH, editors. Social support measurement and intervention: A  
700 guide for health and social scientists. Oxford: Oxford University Press; 2000. pp. 3-25.
- 701 84. Salgado S. Job Insecurity, Financial Threat and Mental Health in the COVID-19 Context:  
702 The Buffer Role of Perceived Social Support [Internet]. OSF; 2020. Available from:  
703 [osf.io/p7xdf](https://osf.io/p7xdf)
